# Supplementary material for: Se vacancy-driven nickel cobalt selenide electrode enhancing reaction kinetics for boosting supercapacitive performance
Source: Royal Society of Chemistry journal article supplement (doi:10.1039/d4nj00500g), 2024-01-01
Supplement: d4nj00500g1.pdf [file d4nj00500g1.pdf]

## Supporting information

### **Se vacancies-driven nickel cobalt selenides electrode for boosting supercapacitive performance**

Xiao Yang<sup>†</sup>, Weizhe Liu<sup>†</sup>, Li Zhang<sup>†\*</sup>, Miaomiao Wang, Huanli Liu

*School of Science, Lanzhou University of Technology, Lanzhou 730050, PR China*

<sup>†</sup>These authors contributed equally to this work.

\*Corresponding author: zhangli@lut.edu.cn (L. Zhang)

Supplementary Figure

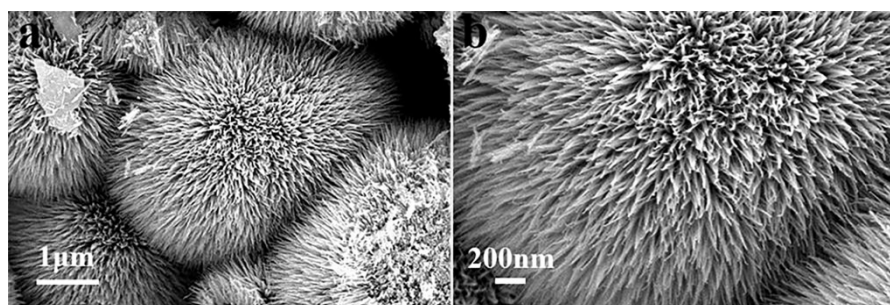

Fig. S1. SEM images of the (a-b) NiCo precursor.

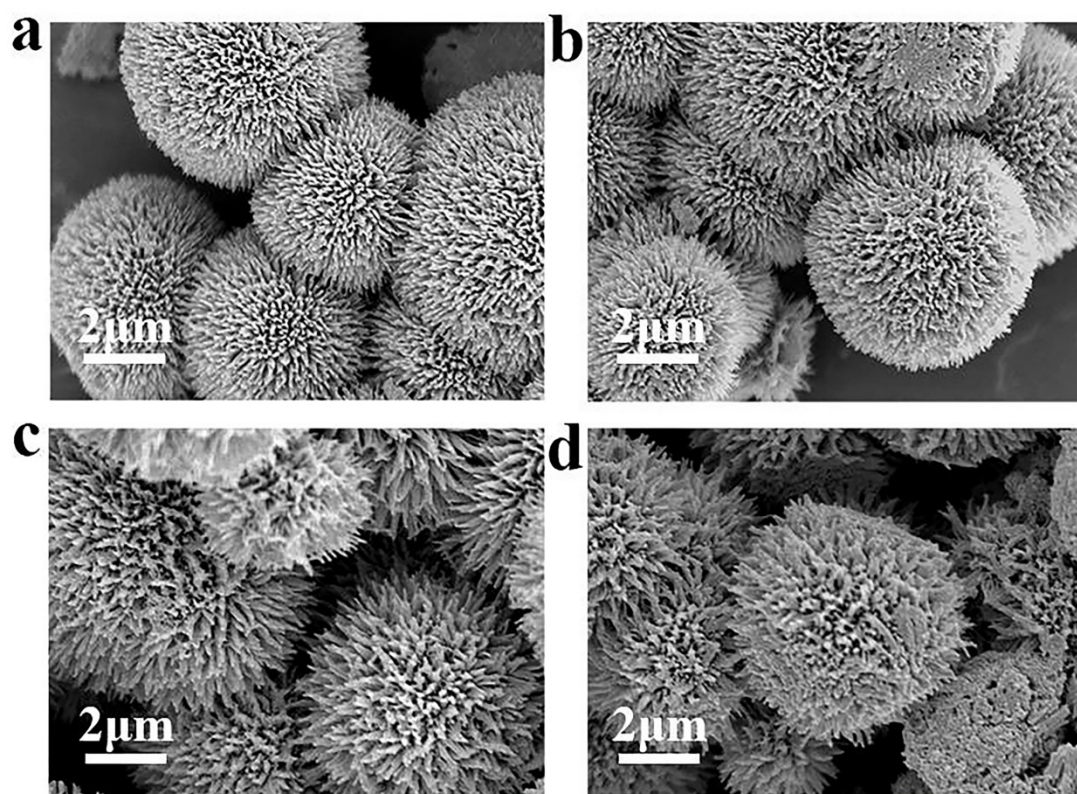

Fig. S2. SEM images of (a) V<sub>0.5</sub>-NiCo<sub>2</sub>Se<sub>x</sub>, (b) V<sub>1</sub>-NiCo<sub>2</sub>Se<sub>x</sub>, (c) V<sub>1.5</sub>-NiCo<sub>2</sub>Se<sub>x</sub>, (d) V<sub>2.5</sub>-NiCo<sub>2</sub>Se<sub>x</sub>.

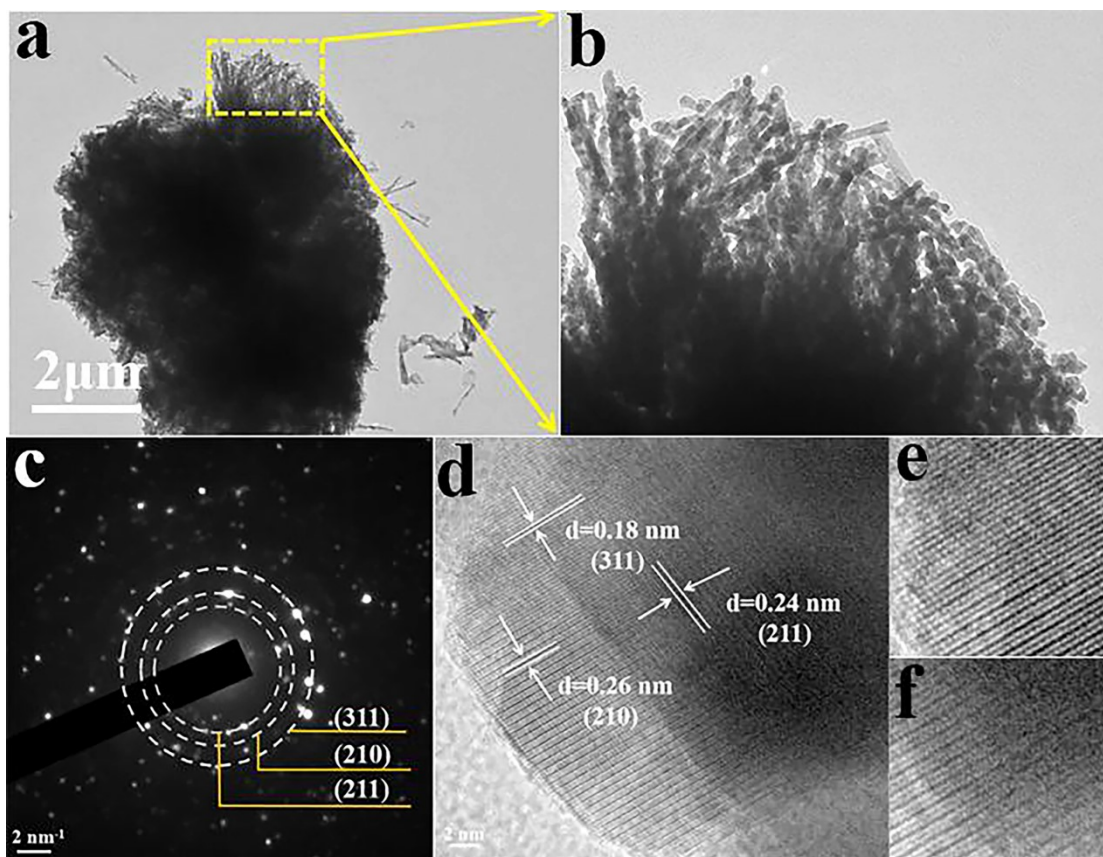

**Fig. S3.** (a-b) TEM images, (c) SAED images, (d-f) HRTEM images of the Pure-NiCo<sub>2</sub>Se<sub>4</sub>.

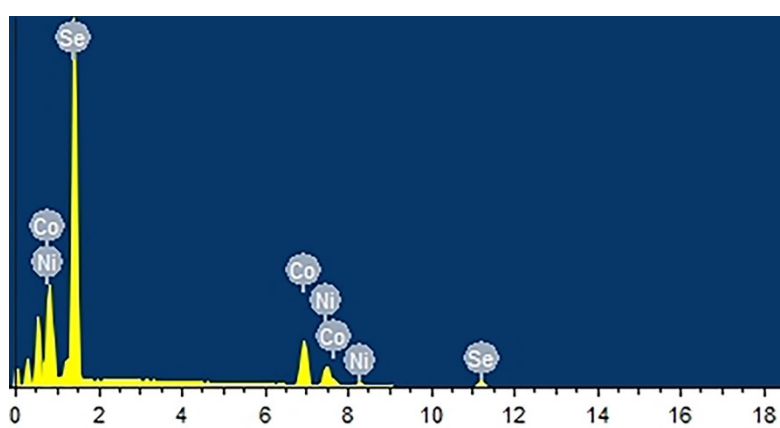

**Fig. S4.** Elemental analysis results from energy dispersive spectrometer in scanning electron microscopy (SEM-EDS) spectrum of V<sub>2</sub>-NiCo<sub>2</sub>Se<sub>x</sub>.

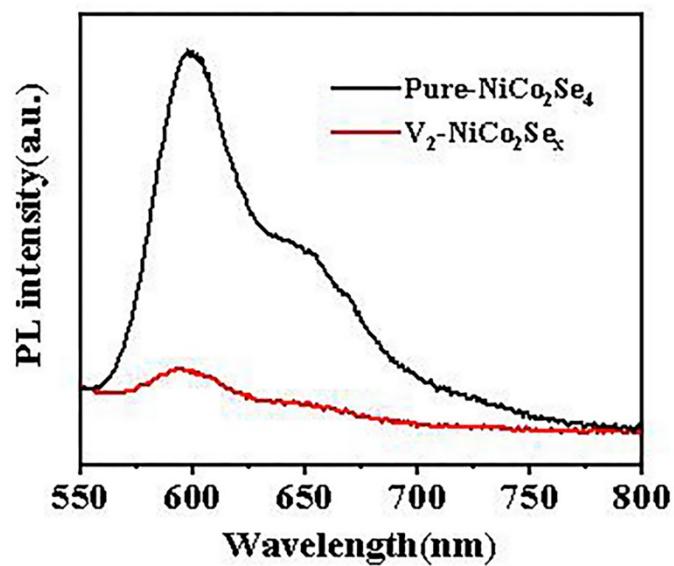

Fig. S5. PL spectras of Pure-NiCo<sub>2</sub>Se<sub>4</sub> and V<sub>2</sub>-NiCo<sub>2</sub>Se<sub>x</sub>.

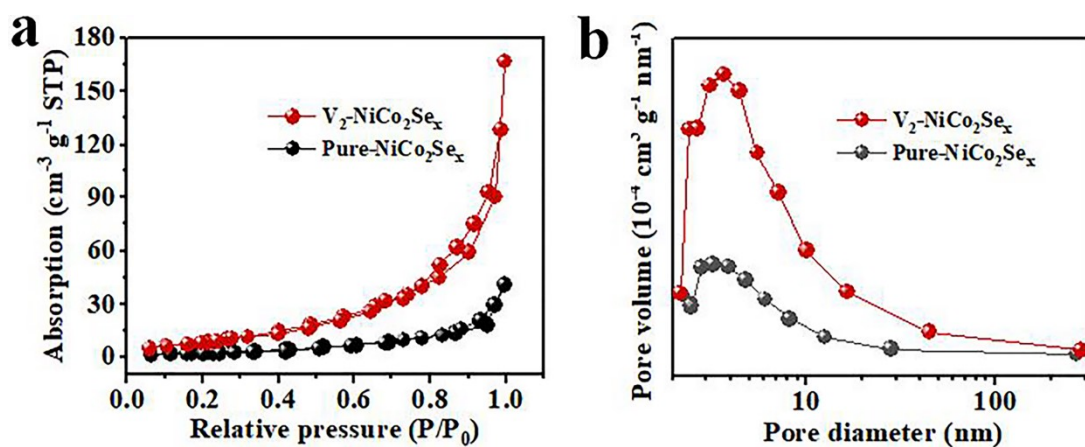

Fig. S6. (a) N<sub>2</sub> adsorption/desorption isotherm, (b) pore size distribution of Pure-NiCo<sub>2</sub>Se<sub>4</sub> and V<sub>2</sub>-NiCo<sub>2</sub>Se<sub>x</sub>.



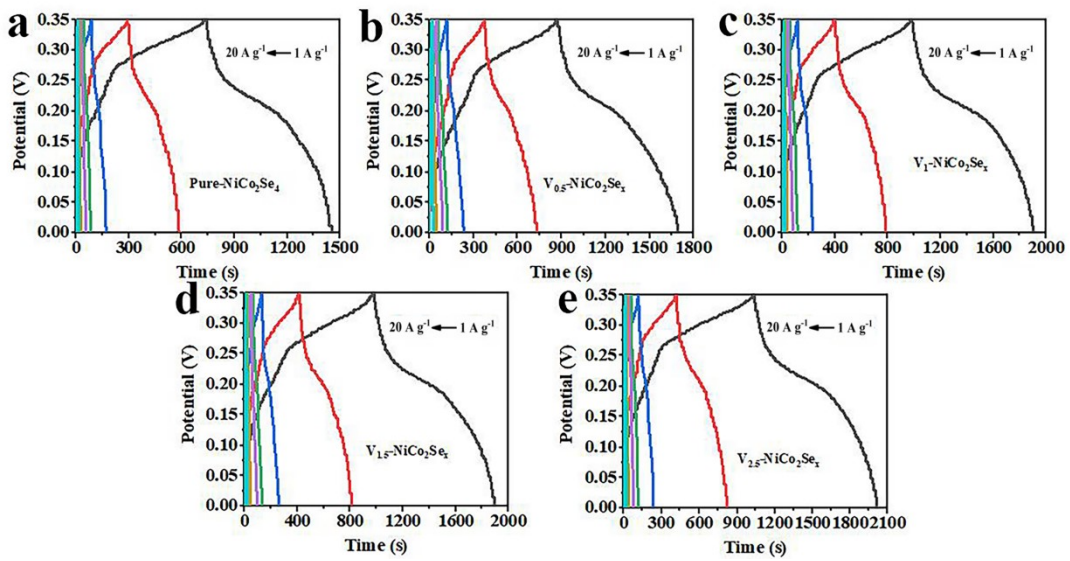

**Fig. S7.** GCD curves of (a) Pure- $\text{NiCo}_2\text{Se}_4$ , (b)  $\text{V}_{0.5}\text{-NiCo}_2\text{Se}_x$ , (c)  $\text{V}_1\text{-NiCo}_2\text{Se}_x$ , (d)  $\text{V}_{1.5}\text{-NiCo}_2\text{Se}_x$  and (e)  $\text{V}_{2.5}\text{-NiCo}_2\text{Se}_x$  under different current densities

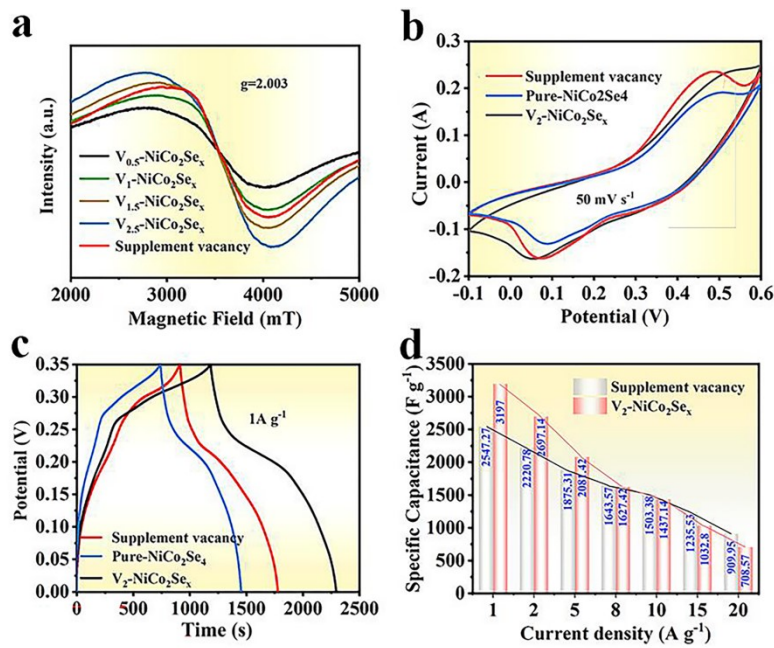

**Fig. S8.** (a) EPR spectra of vacancy supplement material and  $\text{V}_{0.5}\text{-NiCo}_2\text{Se}_x$ ,  $\text{V}_1\text{-NiCo}_2\text{Se}_x$ ,  $\text{V}_{1.5}\text{-NiCo}_2\text{Se}_x$  and  $\text{V}_{2.5}\text{-NiCo}_2\text{Se}_x$ , (b) CV curves of vacancy supplement material and Pure- $\text{NiCo}_2\text{Se}_4$  and  $\text{V}_2\text{-NiCo}_2\text{Se}_x$ . (c) GCD curve comparison of vacancy supplement material and Pure- $\text{NiCo}_2\text{Se}_4$  and  $\text{V}_2\text{-NiCo}_2\text{Se}_x$ , (d) specific capacity of vacancy supplement material and  $\text{V}_2\text{-NiCo}_2\text{Se}_x$  as a function of current density.

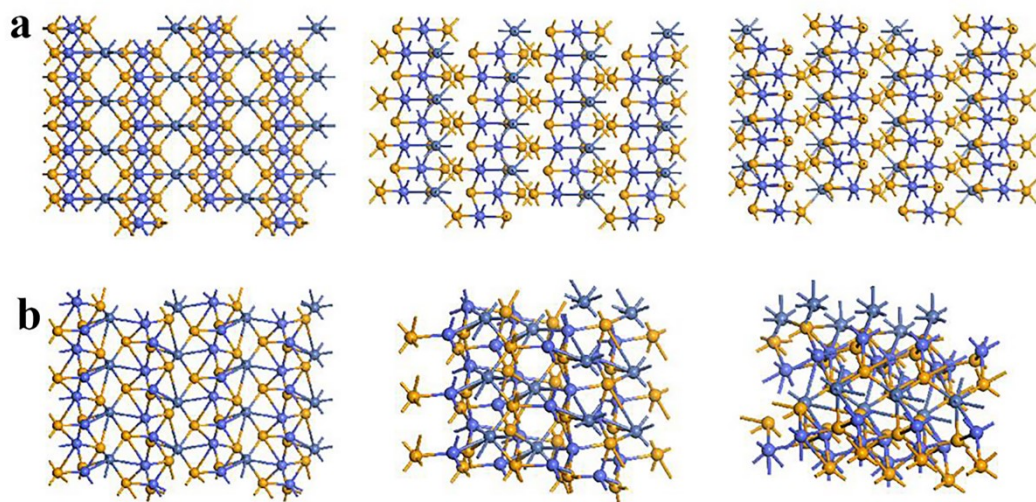

**Fig. S9.** Crystal structure optimization of (a) Pure-NiCo<sub>2</sub>Se<sub>4</sub> and (b) V<sub>2</sub>-NiCo<sub>2</sub>Se<sub>x</sub>.

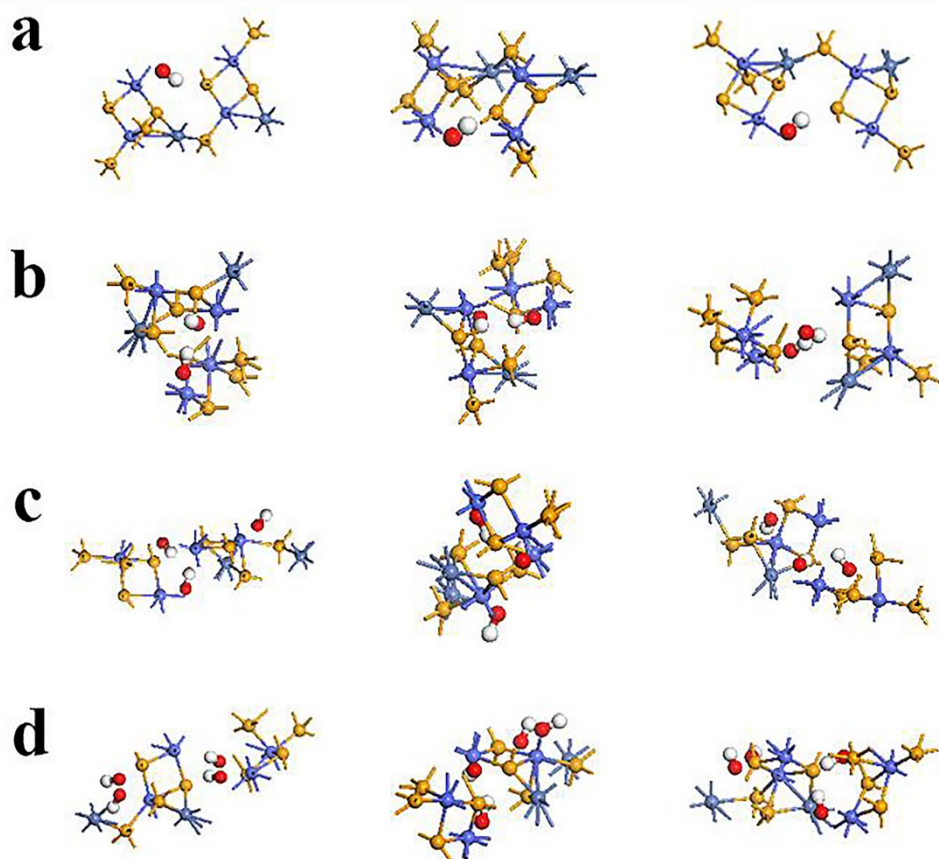

**Fig. S10.** Pure-NiCo<sub>2</sub>Se<sub>4</sub> adsorption (a) one OH<sup>-</sup>, (b) two OH<sup>-</sup>, (c) three OH<sup>-</sup>, (d) four OH<sup>-</sup> structure diagram.

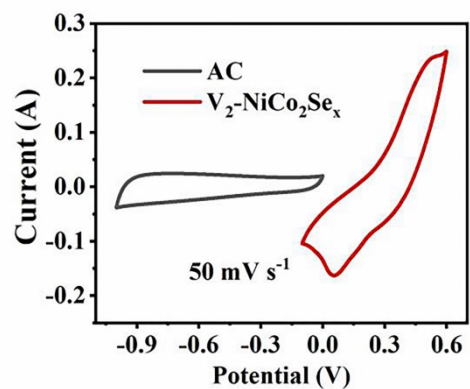

**Fig. S11.** Comparison of CV curves of AC electrode and  $V_2-NiCo_2Se_x$  electrode at  $50 \text{ mV s}^{-1}$  scanning rate.

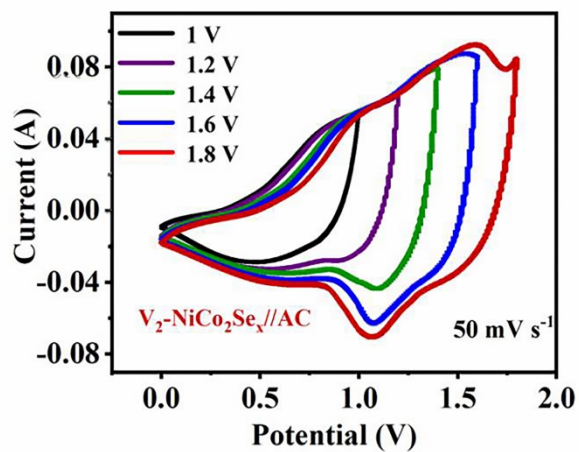

**Fig. S12.** CV curves for different voltage windows at a scan rate of  $50 \text{ mV s}^{-1}$ .

## Supplementary Table

**Table S1.** EDS element contents of Pure-NiCo<sub>2</sub>Se<sub>4</sub> and V<sub>a</sub>-NiCo<sub>2</sub>Se<sub>x</sub>.

| <b>Electrode material</b>                           | <b>Ni (Atomic)</b> | <b>Co (Atomic)</b> | <b>Se (Atomic)</b> |
|-----------------------------------------------------|--------------------|--------------------|--------------------|
| Pure-NiCo <sub>2</sub> Se <sub>4</sub>              | 14.05%             | 26.02%             | 59.93%             |
| V <sub>0.5</sub> -NiCo <sub>2</sub> Se <sub>x</sub> | 15.31%             | 27.17%             | 57.52%             |
| V <sub>1</sub> -NiCo <sub>2</sub> Se <sub>x</sub>   | 16.11%             | 30.36%             | 53.53%             |
| V <sub>1.5</sub> -NiCo <sub>2</sub> Se <sub>x</sub> | 16.89%             | 31.12%             | 51.99%             |
| V <sub>2</sub> -NiCo <sub>2</sub> Se <sub>x</sub>   | 16.95%             | 32.68%             | 50.37%             |
| V <sub>2.5</sub> -NiCo <sub>2</sub> Se <sub>x</sub> | 17.11%             | 33.19%             | 49.70%             |

**Table S2.** Percentage contents of Ni<sup>2+</sup>/Ni<sup>3+</sup>, Co<sup>2+</sup>/Co<sup>3+</sup> and Se 3d<sub>3/2</sub>/Se 3d<sub>5/2</sub> by Pure-NiCo<sub>2</sub>Se<sub>x</sub> and V<sub>a</sub>-NiCo<sub>2</sub>Se<sub>x</sub>.

| <b>Material</b>                                     | <b>Co<sup>2+</sup>/Co<sup>3+</sup></b> | <b>Ni<sup>2+</sup>/Ni<sup>3+</sup></b> | <b>Se 3d<sub>3/2</sub>/Se 3d<sub>5/2</sub></b> |
|-----------------------------------------------------|----------------------------------------|----------------------------------------|------------------------------------------------|
| Pure-NiCo <sub>2</sub> Se <sub>x</sub>              | 0.4605                                 | 0.6677                                 | 1.2970                                         |
| V <sub>0.5</sub> -NiCo <sub>2</sub> Se <sub>x</sub> | 2.2784                                 | 0.2661                                 | 1.4429                                         |
| V <sub>1</sub> -NiCo <sub>2</sub> Se <sub>x</sub>   | 2.4176                                 | 0.1926                                 | 2.1350                                         |
| V <sub>1.5</sub> -NiCo <sub>2</sub> Se <sub>x</sub> | 4.2671                                 | 0.1407                                 | 2.4004                                         |
| V <sub>2</sub> -NiCo <sub>2</sub> Se <sub>x</sub>   | 6.3225                                 | 0.1276                                 | 3.2127                                         |
| V <sub>2.5</sub> -NiCo <sub>2</sub> Se <sub>x</sub> | 9.6260                                 | 0.04                                   | 5.0889                                         |



**Table S3.** Power density and energy density comparison of  $V_2-NiCo_2Se_x$  with recently reported Ni/Co-based electrode materials.

| Supercapacitor device                 | Energy density<br>(Wh kg <sup>-1</sup> ) | Power density<br>(W kg <sup>-1</sup> ) | Reference |
|---------------------------------------|------------------------------------------|----------------------------------------|-----------|
| $Ni_2Co_4Se//HPC$                     | 34.8                                     | 399.9                                  | 1         |
| $CoSe_2/NiSe_2//AC$                   | 27.8                                     | 750.0                                  | 2         |
| $(Ni_{0.33}Co_{0.67})Se_2 CHSs//AC$   | 29.1                                     | 800                                    | 3         |
| $NiCoSe//AC$                          | 16                                       | 750                                    | 4         |
| $Ni_{0.67}Co_{0.33}Se//RGO$           | 36.7                                     | 750                                    | 5         |
| $NiCo_2Se_4/MXene//AC$                | 22.4                                     | 800                                    | 6         |
| $Ni-Co-Se//AC$                        | 38.5                                     | 802.1                                  | 7         |
| $(Ni_{0.5}Co_{0.5})_{0.85}Se//carbon$ | 70.58                                    | 320.02                                 | 8         |
| $NiCoSe_2//AC$                        | 44.4                                     | 776.7                                  | 9         |
| $V_2-NiCo_2Se_x//AC$                  | 76.45                                    | 800.06                                 | This work |
|                                       | 39.48                                    | 16030.14                               |           |

## References

1. Z. Xie, D. Qiu, J. Xia, J. Wei, M. Li, F. Wang and R. Yang, *ACS Appl. Mater. Interfaces*, 2021, **13(10)**, 12006-12015.
2. Y. Lee, J. Soo Kang, I. Jo, Y. Sung and K. Ahn, *J. Electroanal. Chem.*, 2021, **895**, 115479.
3. L. Quan, T. Liu, M. Yi, Q. Chen, D. Cai and H. Zhan, *Electrochim. Acta*, 2018, **281**, 109-116.
4. M. L. Aparna, T. Thomas and G. R. Rao, *J. Electrochem. Soc.*, 2022, **169(2)**, 020515.
5. H. Chen, S. Chen, M. Fan, C. Li, D. Chen, G. Tian and K. Shu, *J. Mater. Chem. A*, 2015, **3(47)**, 23653-23659.
6. Y. Liu, J. Gong, J. Wang, C. Hu, M. Xie, X. Jin, S. Wang and Y. Dai, *J. Alloys Compd.*, 2022, **899**, 163354.
7. G. Qu, X. Zhang, G. Xiang, Y. Wei, J. Yin, Z. Wang, X. Zhang and X. Xu, *Chin. Chem. Lett.*, 2020, **31(7)**, 2007-2012.
8. L. Du, W. Du, Y. Zhao, N. Wang, Z. Yao, S. Wei, Y. Shi and B. Zhang, *J. Alloys Compd.*, 2019, **778**, 848-857.
9. L. Wang, Z. Feng, H. Zhang, D. Li and P. Xing, *Nanotechnology*, 2020, **31(12)**, 125403.
